# Supplementary material for: Comparative Study of Pd–Ni Bimetallic Catalysts Supported on UiO-66 and UiO-66-NH2 in Selective 1,3-Butadiene Hydrogenation
Source: MDPI journal article supplement (doi:10.3390/nano12091484), 2022-04-27
Supplement: s1 [file s1]

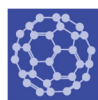

# Comparative Study of Pd–Ni Bimetallic Catalysts Supported on UiO-66 and UiO-66-NH<sub>2</sub> in Selective 1,3-Butadiene Hydrogenation

Lili Liu <sup>1</sup>, Lei Yu <sup>1</sup>, Xiaojing Zhou <sup>1</sup>, Chunling Xin <sup>1</sup>, Songyuan Sun <sup>1</sup>, Zhidong Liu <sup>1</sup>, Jinyu Zhang <sup>2</sup>, Ying Liu <sup>1,\*</sup> and Xishi Tai <sup>1,\*</sup>

<sup>1</sup> School of Chemistry & Chemical Engineering and Environmental Engineering, Weifang University, Weifang 261061, China; liulili122@wfu.edu.cn (L.L.); jimoyulei@163.com (L.Y.); zhouxiaojing105@wfu.edu.cn (X.Z.); 20150015@wfu.edu.cn (C.X.); ssy1210661650@foxmail.com (S.S.); liuzhidong0518@foxmail.com (Z.L.)

<sup>2</sup> Shandong Huazhiyuan Testing Co., Ltd., Weifang 261061, China; ziyjinyu@163.com

\* Correspondence: liuying@wfu.edu.cn (Y.L.); taixs@wfu.edu.cn (X.T.)

## Catalyst characterization

The structure of the samples was conducted on a X-ray diffractometer (XRD, Brüker D8 Advance, Karlsruhe, Germany) with a Ni filter Cu K $\alpha$  ( $\lambda = 0.154$  nm) radiation. The textural properties of the samples were investigated using a Quantachrome instrument (Boynton Beach, FL, USA) at 77 K after out-gassing at 150 °C for 12 h. The chemical valence of Pd and Ni was investigated using a PHI Quantum-2000 X-ray photoelectron spectrometer (XPS, Boynton Beach, FL, USA), with Al-K $\alpha$  radiation of 1486.6 eV as incident beam. The morphology and Pd–Ni distribution were measured by a JEOL-JEM-2010 transmission electron microscopy (TEM, Jeol, Japan). Energy dispersive X-ray spectroscopy (EDS) was performed on an Oxford X-MaxN 80T IE250 instrument (Oxford, UK). The alkaline properties of UiO-66-NH<sub>2</sub> and UiO-66 were tested via CO<sub>2</sub> temperature-programmed desorption (CO<sub>2</sub>-TPD) using Chemisorption Analyzer (MicrotracBEL AutoChem BELCAT-B, Bel, Osaka, Japan) equipped with a thermal conductivity detector. The Pd and Ni weight contents were studied using an Optima 5300DV inductively coupled plasma-optical emission spectrometer (ICP-OES, Waltham, MA, USA).

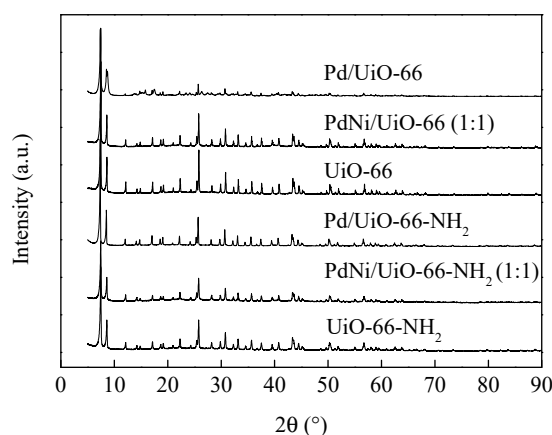

**Figure S1.** PXRD analysis of UiO-66, PdNi/UiO-66 (1:1), Pd/UiO-66, UiO-66-NH<sub>2</sub>, PdNi/UiO-66-NH<sub>2</sub> (1:1), and Pd/UiO-66-NH<sub>2</sub>.

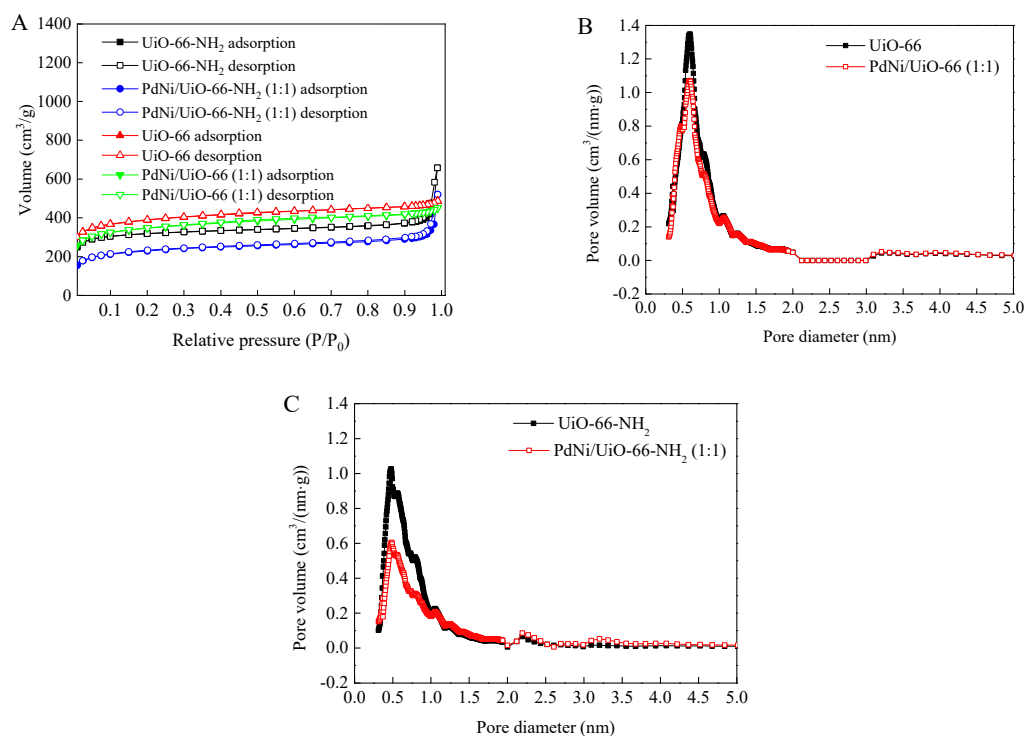

**Figure S2.** The N<sub>2</sub> adsorption-desorption isotherms (A) and pore size distribution (B,C) of UiO-66-NH<sub>2</sub>, PdNi/UiO-66-NH<sub>2</sub>(1:1), UiO-66, and PdNi/UiO-66(1:1).

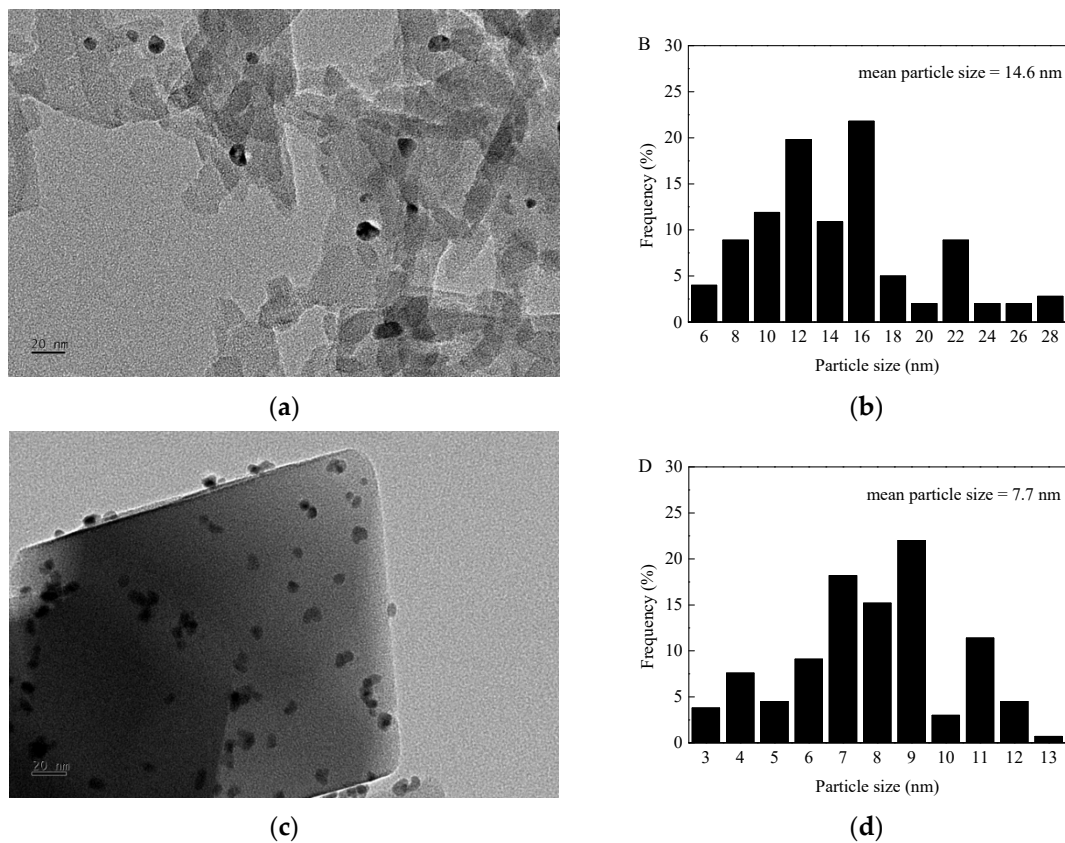

**Figure S3.** TEM images and Pd NP size distribution of Pd/UiO-66 (A,B) and Pd/UiO-66-NH<sub>2</sub> (C,D).

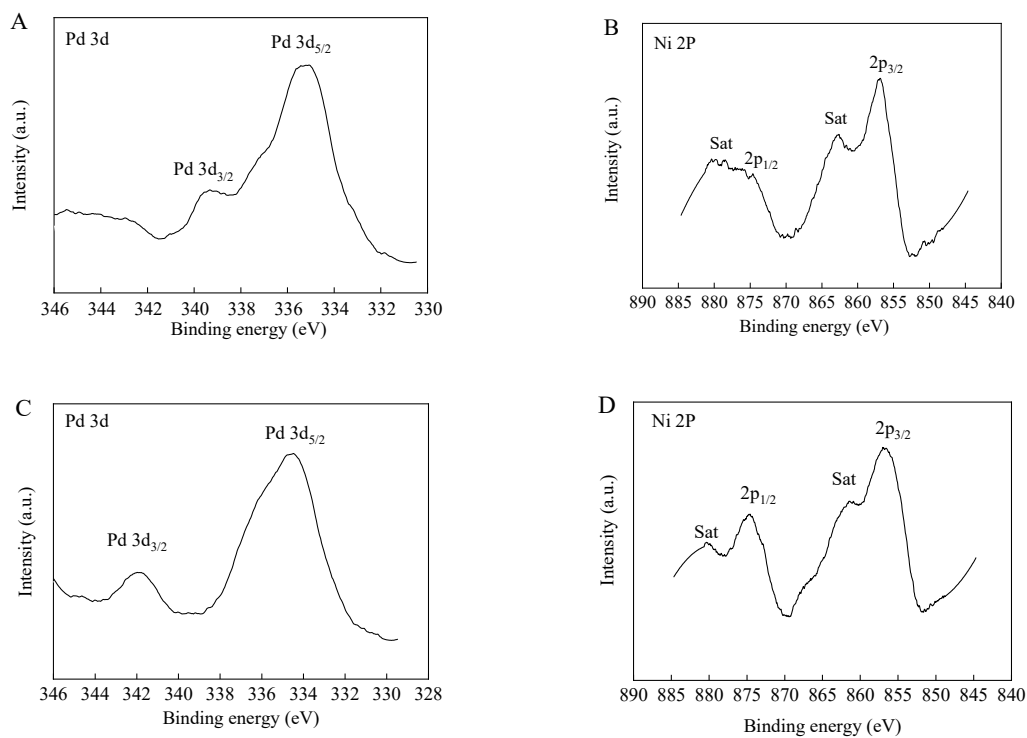

**Figure S4.** XPS spectra of PdNi/UiO-66-NH<sub>2</sub> (1:1) (A,B) and PdNi/UiO-66 (1:1) (C,D).

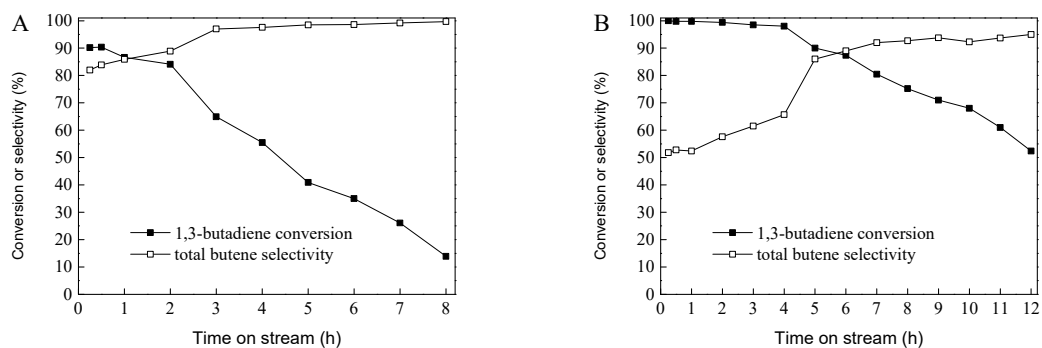

**Figure S5.** Evolution of the BD conversion and product selectivity with time-on-stream for Pd/UiO-66 (A) and Pd/UiO-66-NH<sub>2</sub> (B) at 50 °C (reaction conditions: 5 mg of catalyst, 6.5 mL/min of H<sub>2</sub> flow rate, 20 mL/min of 1.0 vol.%BD/N<sub>2</sub> flow rate).

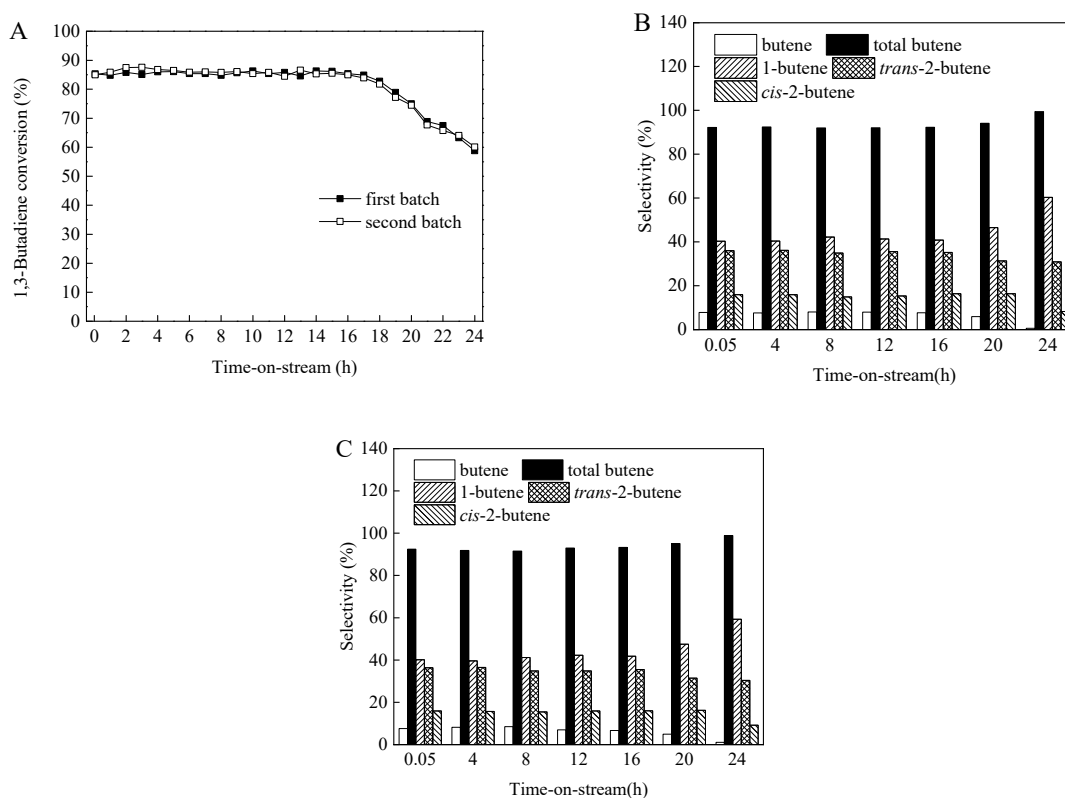

**Figure S6.** Evolution of the BD conversion and product selectivity with time-on-stream for the first batch and second batch of PdNi/Uio-66-NH<sub>2</sub> (1:1) at 55 °C: (A) BD conversion; (B) Product selectivity for first batch; (C) Product selectivity for second batch (reaction conditions: 5 mg of catalyst, 6.5 mL/min of H<sub>2</sub> flow rate, 20 mL/min of 1.0 vol.%BD/N<sub>2</sub> flow rate).

**Table S1.** The Pd and Ni weight content of Pd–Ni bimetallic catalysts.

| Catalyst                          | Pd (wt%) | Ni (wt%) | Mole Ratio of Pd:Ni |
|-----------------------------------|----------|----------|---------------------|
| PdNi/Uio-66-NH <sub>2</sub> (3:1) | 3.31     | 0.65     | 3:1                 |
| PdNi/Uio-66-NH <sub>2</sub> (2:1) | 2.93     | 0.85     | 2:1                 |
| PdNi/Uio-66-NH <sub>2</sub> (1:1) | 2.51     | 1.33     | 1:1                 |
| PdNi/Uio-66-NH <sub>2</sub> (1:2) | 1.79     | 2.12     | 1:2                 |
| PdNi/Uio-66-NH <sub>2</sub> (1:3) | 1.49     | 2.55     | 1:3                 |
| PdNi/Uio-66 (3:1)                 | 3.31     | 0.64     | 3:1                 |
| PdNi/Uio-66 (2:1)                 | 2.92     | 0.94     | 2:1                 |
| PdNi/Uio-66 (1:1)                 | 2.65     | 1.38     | 1:1                 |
| PdNi/Uio-66 (1:2)                 | 1.82     | 2.19     | 1:2                 |
| PdNi/Uio-66 (1:3)                 | 1.45     | 2.49     | 1:3                 |
| Pd/Uio-66-NH <sub>2</sub>         | 1.54     | -        | -                   |
| Pd/Uio-66                         | 1.42     | -        | -                   |
